# Supplementary material
Source: publisher site journal article supplement (https://www.dovepress.com/article/472099)
Supplement: Supplementary file 1 [file get_supplementary_file.php]

| Table S1 Univariate Cox regression analysis identified 43 prognostically relevant features. | | | | | |
| --- | --- | --- | --- | --- | --- |
| gene | HR | z | pvalue | lower | upper |
| Thrombin.time.ratio | 1.586 | 1.994 | 0.029 | 1.187 | 2.119 |
| Non.invasive.mechanical.ventilation | 1.421 | 3.990 | 0.002 | 1.247 | 1.621 |
| Unconsciousness | 1.375 | 3.552 | 0.001 | 1.217 | 1.554 |
| Invasive.Mechanical.Ventilation | 1.347 | 2.932 | 0.012 | 1.121 | 1.617 |
| Cardiac.ischemia | 1.345 | 2.692 | 0.001 | 1.066 | 1.696 |
| Interleukin.10 | 1.343 | 5.198 | 0.008 | 1.181 | 1.528 |
| Bacterial | 1.332 | 2.272 | 0.027 | 1.174 | 1.510 |
| Paxlovid | 1.321 | 2.144 | 0.014 | 1.126 | 1.551 |
| Interleukin.5 | 1.321 | 1.963 | 0.007 | 1.169 | 1.492 |
| Triglyceride | 1.314 | 2.347 | 0.006 | 1.180 | 1.464 |
| CD4.CD8.ratio | 1.314 | 2.241 | 0.048 | 1.165 | 1.481 |
| Procalcitonin | 1.306 | 3.369 | 0.007 | 1.073 | 1.590 |
| Calcium.ion | 1.302 | 2.543 | 0.031 | 1.149 | 1.475 |
| Neutrophil.absolute.value | 1.286 | 3.605 | 0.043 | 1.136 | 1.456 |
| White.blood.cell | 1.284 | 3.304 | 0.011 | 1.152 | 1.431 |
| CT.Scan.of.the.Lungs | 1.284 | 2.225 | 0.004 | 1.170 | 1.409 |
| Neutrophilic.granulocyte.percentage | 1.283 | 3.366 | 0.048 | 1.143 | 1.440 |
| B.di.microglobulin | 1.282 | 2.161 | 0.017 | 1.152 | 1.427 |
| Creatine.kinase.MB.subtype | 1.281 | 4.430 | 0.008 | 1.147 | 1.430 |
| Respiratory.Rate | 1.278 | 3.668 | 0.041 | 1.145 | 1.427 |
| Fibrin.degradation.product | 1.278 | 3.456 | 0.042 | 1.127 | 1.449 |
| Heart.Rate | 1.276 | 2.093 | 0.035 | 1.174 | 1.388 |
| Aspartate.aminotransferase | 1.275 | 3.422 | 0.044 | 1.142 | 1.423 |
| Troponin | 1.274 | 3.133 | 0.022 | 1.145 | 1.419 |
| Alpha.hydroxybutyric.dehydrogenase | 1.273 | 6.755 | 0.045 | 1.162 | 1.396 |
| Creatinine | 1.271 | 2.486 | 0.040 | 1.146 | 1.410 |
| Alkaline..phosphatase | 1.268 | 2.727 | 0.045 | 1.149 | 1.400 |
| Lactic.dehydrogenase | 1.263 | 6.767 | 0.031 | 1.127 | 1.417 |
| Uric.Acid | 1.263 | 2.123 | 0.029 | 1.135 | 1.406 |
| Myohemoglobin | 1.261 | 3.292 | 0.006 | 1.126 | 1.414 |
| Nasal.catheter.oxygenation | 0.720 | -3.782 | 0.000 | 0.550 | 0.943 |
| Albumin.globulin | 0.700 | -2.023 | 0.043 | 0.533 | 0.920 |
| Lymphocyte.absolute.value | 0.695 | -2.000 | 0.046 | 0.517 | 0.934 |
| Eosinophils.percentage | 0.685 | -2.295 | 0.022 | 0.507 | 0.927 |
| Eosinophil.absolute.value | 0.684 | -2.060 | 0.039 | 0.498 | 0.939 |
| Percentage.of.CD3.cells | 0.667 | -2.179 | 0.004 | 0.451 | 0.986 |
| Basophilic.granulocyte | 0.650 | -2.290 | 0.041 | 0.481 | 0.878 |
| Pondus.Hydrogenii | 0.635 | -2.394 | 0.014 | 0.439 | 0.918 |
| CD45.total.lymphocyte.absolute.value | 0.613 | -2.671 | 0.040 | 0.416 | 0.903 |
| Blood.platelet.count | 0.607 | -2.009 | 0.007 | 0.378 | 0.977 |
| Monocyte.percentage | 0.570 | -2.247 | 0.018 | 0.379 | 0.857 |
| Lymphocyte.percentage | 0.549 | -3.272 | 0.019 | 0.368 | 0.819 |
| Pro.brain.natriuretic.peptide | 0.428 | 4.395 | 0.024 | 0.256 | 0.718 |

| Table S2 Comparison of the clinical characteristics in COVID-19 among total, train and test. | | | | | |
| --- | --- | --- | --- | --- | --- |
| Variable |  | all patients(n=189) | training (n=95) | validation(n=94) | *P* |
| OS | n(%) | 47 （24.9%） | 25 （26.3%） | 22 （23.4%） | 0.90 |
| Non invasive mechanical ventilation | n(%) | 13 （6.9%） | 7 （7.4%） | 6 （6.4%） | 0.97 |
| Nasal catheter oxygenation | n(%) | 133 （70.4%） | 66 （69.5%） | 67 （71.3%） | 0.96 |
| Unconsciousness | n(%) | 18 （9.5%） | 9 （9.5%） | 9 （9.6%） | 1.00 |
| Invasive Mechanical Ventilation | n(%) | 16 （8.5%） | 9 （9.5%） | 7 （7.4%） | 0.88 |
| Cardiac ischemia | n(%) | 87 （46%） | 45 （47.4%） | 42 （44.7%） | 0.93 |
| Bacterial | n(%) | 66 （34.9%） | 32 （33.7%） | 34 （36.2%） | 0.94 |
| Paxlovid | n(%) | 25 （13.2%） | 16 （16.8%） | 9 （9.6%） | 0.34 |
| Albumin globulin | Median [IQR] | 1.11 （0.9-1.3） | 1.09（0.905-1.28） | 1.145(0.9-1.3175) | 0.88 |
| Alkaline phosphatase | Median [IQR] | 73(60-101) | 71（60-100.5） | 73(59-100.5) | 0.79 |
| Alpha hydroxybutyric dehydrogenase | Median [IQR] | 195(149-278) | 195（144.5-287） | 197.5(151-270) | 0.97 |
| Aspartate aminotransferase | Median [IQR] | 26(18-43) | 26（18.25-44.15） | 24.9(18-42.525) | 0.98 |
| β-di-microglobulin | Median [IQR] | 2.86(2.16-3.98) | 2.91（2.3-3.81） | 2.8(2.8-2.0375) | 0.89 |
| Basophilic granulocyte | Median [IQR] | 0.2(0.1-0.34) | 0.2（0.1-0.315） | 0.2(0.1-0.4) | 0.92 |
| Blood platelet count | Median [IQR] | 201（155-281） | 198（157-284） | 208(49.25-272.75) | 0.56 |
| Calcium ion | Median [IQR] | 2.06（1.97-2.16） | 2.05（1.99-2.145） | 2.06(1.93-2.1575) | 0.33 |
| CD4 CD8 ratio | Median [IQR] | 1.42（0.83-2.53） | 1.52（0.81-2.54） | 1.415(0.8825-2.31) | 0.68 |
| CD45 total lymphocyte absolute value | Median [IQR] | 749.8（423.22-1217.4） | 739.8（422.38-1103.9） | 844.67(432.61-1219.8) | 0.49 |
| Creatine kinase MB subtype | Median [IQR] | 18（13-25） | 17（12-23） | 20(14-25) | 0.19 |
| Creatinine | Median [IQR] | 62（51-84） | 61（51-73.9） | 67.5(51.25-90.9) | 0.33 |
| CT Scan of the Lungs | Median [IQR] | 12（8-18） | 11（7-17） | 12(8.25-19) | 0.46 |
| Eosinophil absolute value | Median [IQR] | 0（0-0.09） | 0（0-0.08） | 0(0-0.1) | 0.66 |
| Eosinophils percentage | Median [IQR] | 0.1（0-1.2） | 0（0-1.05） | 0.2(0-1.275) | 0.15 |
| Fibrin degradation product | Median [IQR] | 2.74（1.3-7.04） | 3.1（1.3-8.73） | 2.61（1.33-4.51） | 0.50 |
| Heart Rate | Median [IQR] | 86（74-96） | 86（73.5-96） | 85.5（74.5-95.5） | 0.99 |
| Interleukin 5 | Median [IQR] | 3（3-3.65） | 3（3-3.55） | 3（3-3.65) | 0.29 |
| Interleukin 10 | Median [IQR] | 5.16（3.96-7.99） | 4.95（3.63-4.11） | 5.51(3.8678-8.11) | 0.82 |
| Lactic dehydrogenase | Median [IQR] | 265（202-365） | 263（202-365） | 265.5(201.5-360) | 0.99 |
| Lymphocyte absolute value | Median [IQR] | 0.72（0.5-1.25） | 0.7（0.415-1.225） | 0.775(0.5-1.28) | 0.79 |
| Lymphocyte percentage | Median [IQR] | 13（6.4-20.2） | 11.1（6.1-19.2） | 13.95(6.925-20.425) | 0.60 |
| Monocyte percentage | Median [IQR] | 6.3（3.96-9.06） | 6.4（4.25-8.65） | 6.25(3.6-9.25) | 1.00 |
| Myohemoglobin | Median [IQR] | 68（45-117.5） | 66（39.8-127） | 73(47-116.62) | 0.79 |
| Neutrophil absolute value | Median [IQR] | 4.9（3.59-7.7） | 4.95（3.45-7.35） | 4.85(3.5925-8) | 1.00 |
| Neutrophilic granulocyte percentage | Median [IQR] | 79.5（67.2-88.6） | 80.8（72.75-88.5） | 77.25(66.1-88.675) | 0.63 |
| OS time | Median [IQR] | 16（12-24） | 16（12-24.5） | 16.5(12-23) | 0.95 |
| Percentage of CD3 cells | Median [IQR] | 63.46（49.69-73.71） | 60.95（46.76-72.39） | 64.8(53.882-74.713) | 0.43 |
| Pondus Hydrogenii | Median [IQR] | 7.45（7.424-7.48） | 7.456（7.432-7.4845） | 7.443(7.4119-7.468) | 0.11 |
| Pro brain natriuretic peptide | Median [IQR] | 624（213-2775） | 634（220.5-2932） | 564.5(168.5-2369.5) | 0.89 |
| Procalcitonin | Median [IQR] | 0.05（0.03-0.18） | 0.05（0.03-0.18） | 0.05(0.03-0.2175) | 0.99 |
| Respiratory Rate | Median [IQR] | 20（20-22） | 20（20-22） | 20(20-22.75) | 1.00 |
| Thrombin time ratio | Median [IQR] | 1.03（0.99-1.12） | 1.04（0.15-0.99） | 1.025(0.1275-0.9825) | 0.67 |
| Triglyceride | Median [IQR] | 1.11（0.81-1.6） | 0.94（0.745-0.775） | 1.185(0.84-1.6625) | 0.44 |
| Troponin | Median [IQR] | 0.01（0-0.04） | 0.01（0-0.05） | 0.01(0-0.03) | 0.55 |
| Uric Acid | Median [IQR] | 205（142-287） | 205（141.65-258） | 205.3(143.5-323.75) | 0.70 |
| White blood cell | Median [IQR] | 6.7（5-9.5） | 6.7（4.95-9.1） | 6.665(5.4-9.175) | 0.94 |
